# Supplementary material for: Occurrence of the Persistent Antimicrobial Triclosan in Microwave Pretreated and Anaerobically Digested Municipal Sludges under Various Process Conditions
Source: PubMed Central journal article supplement (PMC7024389; doi:10.3390/molecules25020310), 2020-01-12
Supplement: molecules-25-00310-s001.pdf [file molecules-25-00310-s001.pdf]

## Supplementary Materials for

# Occurrence of the persistent antimicrobial triclosan in microwave pretreated and anaerobically digested municipal sludges under various process conditions

Gokce Kor-Bicakci <sup>1,2</sup>, Timothy Abbott <sup>1</sup>, Emine Ubay-Cokgor <sup>2</sup> and Cigdem Eskicioglu <sup>1,\*</sup>

<sup>1</sup> UBC Bioreactor Technology Group, School of Engineering, University of British Columbia Okanagan Campus, Kelowna, British Columbia V1V 1V7, Canada; [gokce.kor@gmail.com](mailto:gokce.kor@gmail.com) (G.K.B.); [tim.abbott@alumni.ubc.ca](mailto:tim.abbott@alumni.ubc.ca) (T.A.)

<sup>2</sup> Istanbul Technical University, Civil Engineering Faculty, Environmental Engineering Department, 34469 Maslak, Istanbul, Turkey; [ubay@itu.edu.tr](mailto:ubay@itu.edu.tr) (E.U.C.)

\* Correspondence: [cigdem.eskicioglu@ubc.ca](mailto:cigdem.eskicioglu@ubc.ca) (C.E.); Tel.: +1-250-807-8544.

| Tables                                                                                      | Page |
|---------------------------------------------------------------------------------------------|------|
| Table S1. Further information about triclosan and five of its transformation products ..... | 2    |
| Table S2. Optimized MS/MS conditions used for each analyte quantification .....             | 3    |
| Table S3. Validation of developed method for each analyte .....                             | 4    |

**Table S1.** Further information about triclosan and five of its transformation products.

| Analyte                            | IUPAC Name                                                           | Molecular Weight (g/mol) | Chemical structure                                                                    |
|------------------------------------|----------------------------------------------------------------------|--------------------------|---------------------------------------------------------------------------------------|
| <b>Parent compound</b>             |                                                                      |                          |                                                                                       |
| Triclosan (TCS)                    | 5-chloro-2-(2,4-dichlorophenoxy)phenol                               | 289.54                   | 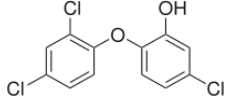   |
| <b>Transformation products</b>     |                                                                      |                          |                                                                                       |
| Triclosan O-β-D-glucuronide        | 5-chloro-2-(2,4-dichlorophenoxy)phenyl β-D-glucopyranosiduronic acid | 487.65 <sup>a</sup>      |    |
| Triclosan-O-Sulfate                | Sodium 5-chloro-2-(2,4-dichlorophenoxy)phenyl sulfate                | 391.59 <sup>a</sup>      |    |
| Tetra-III                          | 5,6-dichloro-2-(2,4-dichlorophenoxy)phenol                           | 323.978                  |    |
| Penta                              | 4,5,6-trichloro-2-(2,4-dichlorophenoxy)phenol                        | 358.432                  |   |
| 2,3,4-TCP                          | 2,3,4-trichlorophenol                                                | 197.45                   |  |
| <b>Internal standard</b>           |                                                                      |                          |                                                                                       |
| Triclocarban (TCC-d <sub>4</sub> ) | 1-(4-chlorophenyl)-3-(3,4-dichlorophenyl)urea-d <sub>4</sub>         | 319.61                   | -                                                                                     |

<sup>a</sup>as sodium salt.

**Table S2.** Optimized MS/MS conditions used for each analyte quantification.

| Compound                                          | Ion Source | Parent ion (m/z) | Cone potential (V) | Fragment ion (m/z)   | Collision Energy (V) | Capillary voltage (kV) |                   |
|---------------------------------------------------|------------|------------------|--------------------|----------------------|----------------------|------------------------|-------------------|
|                                                   |            |                  |                    |                      |                      | <sup>a</sup> ESI-      | <sup>b</sup> ESI+ |
| <i>Parent compound:</i>                           |            |                  |                    |                      |                      |                        |                   |
| Triclosan (TCS)                                   | ESI-       | 286.9            | 20                 | 34.9                 | 10                   | 0.6                    | 0.6               |
| <i>Transformation products:</i>                   |            |                  |                    |                      |                      |                        |                   |
| Triclosan O- $\beta$ -D-glucuronide               | ESI-       | 465.0            | 34                 | 113.0                | 18                   | 0.6                    | 0.6               |
| Triclosan-O-Sulfate                               | ESI-       | 368.9            | 34                 | 288.9                | 18                   | 0.6                    | 0.6               |
| Tetra-III                                         | ESI-       | 322.8            | 24                 | 34.9                 | 12                   | 0.6                    | 0.6               |
| Penta                                             | ESI-       | 356.8            | 26                 | 34.8                 | 14                   | 0.6                    | 0.6               |
| 2,3,4-trichlorophenol                             | ESI-       | 194.8            | 38                 | 158.8                | 18                   | 0.6                    | 0.6               |
| Triclocarban-d <sub>4</sub> (TCC-d <sub>4</sub> ) | ESI-       | 317.0            | 44                 | 129.9834<br>159.9541 | 24, 14               | varies                 | varies            |

<sup>a</sup>negative ionization mode, <sup>b</sup>positive ionization mode.

**Table S3.** Validation of developed method for each analyte.

| <b>Compound</b>                     | <b>LOD<sup>a</sup></b><br>(ppb) | <b>LOQ<sup>b</sup></b><br>(ppb) | <b>RL<sup>c</sup></b><br>(ppb) | <b>Recovery</b><br>(%) |
|-------------------------------------|---------------------------------|---------------------------------|--------------------------------|------------------------|
| <i>Parent compound:</i>             |                                 |                                 |                                |                        |
| Triclosan (TCS)                     | 0.33                            | 0.50                            | 1.10                           | 112.50                 |
| <i>Transformation products:</i>     |                                 |                                 |                                |                        |
| Triclosan O- $\beta$ -D-glucuronide | 1.44                            | 5.22                            | 5.46                           | 107.24                 |
| Triclosan-O-Sulfate                 | 0.12                            | 0.31                            | 0.50                           | 317.64                 |
| Tetra-III                           | 0.58                            | 0.95                            | 4.92                           | 110.3                  |
| Penta                               | 0.09                            | 0.25                            | 0.46                           | 105.18                 |
| 2,3,4-trichlorophenol               | 0.26                            | 0.57                            | 0.69                           | 114.2                  |

<sup>a</sup>LOD: limit of detection, <sup>b</sup>LOQ: limit of quantification, <sup>c</sup>RL: reporting limit.
